# Supplementary material
Source: HighWire-hosted journal article supplement (doi:10.1101/rna.078825.121)
Supplement: Supplemental_Material_.docx [file Supplemental_Material_.docx]

**Supplementary Material**

**Crystal structure of the severe acute respiratory syndrome coronavirus 2 (SARS-CoV-2) frameshifting pseudoknot**

Christopher P. Jones and Adrian R. Ferré-D’Amaré

Biochemistry and Biophysics Center, National Heart, Lung and Blood Institute, Bethesda, MD, USA

Address correspondence to C.P.J. (christopher.jones2@nih.gov) or A.R.F. (adrian.ferre@nih.gov)


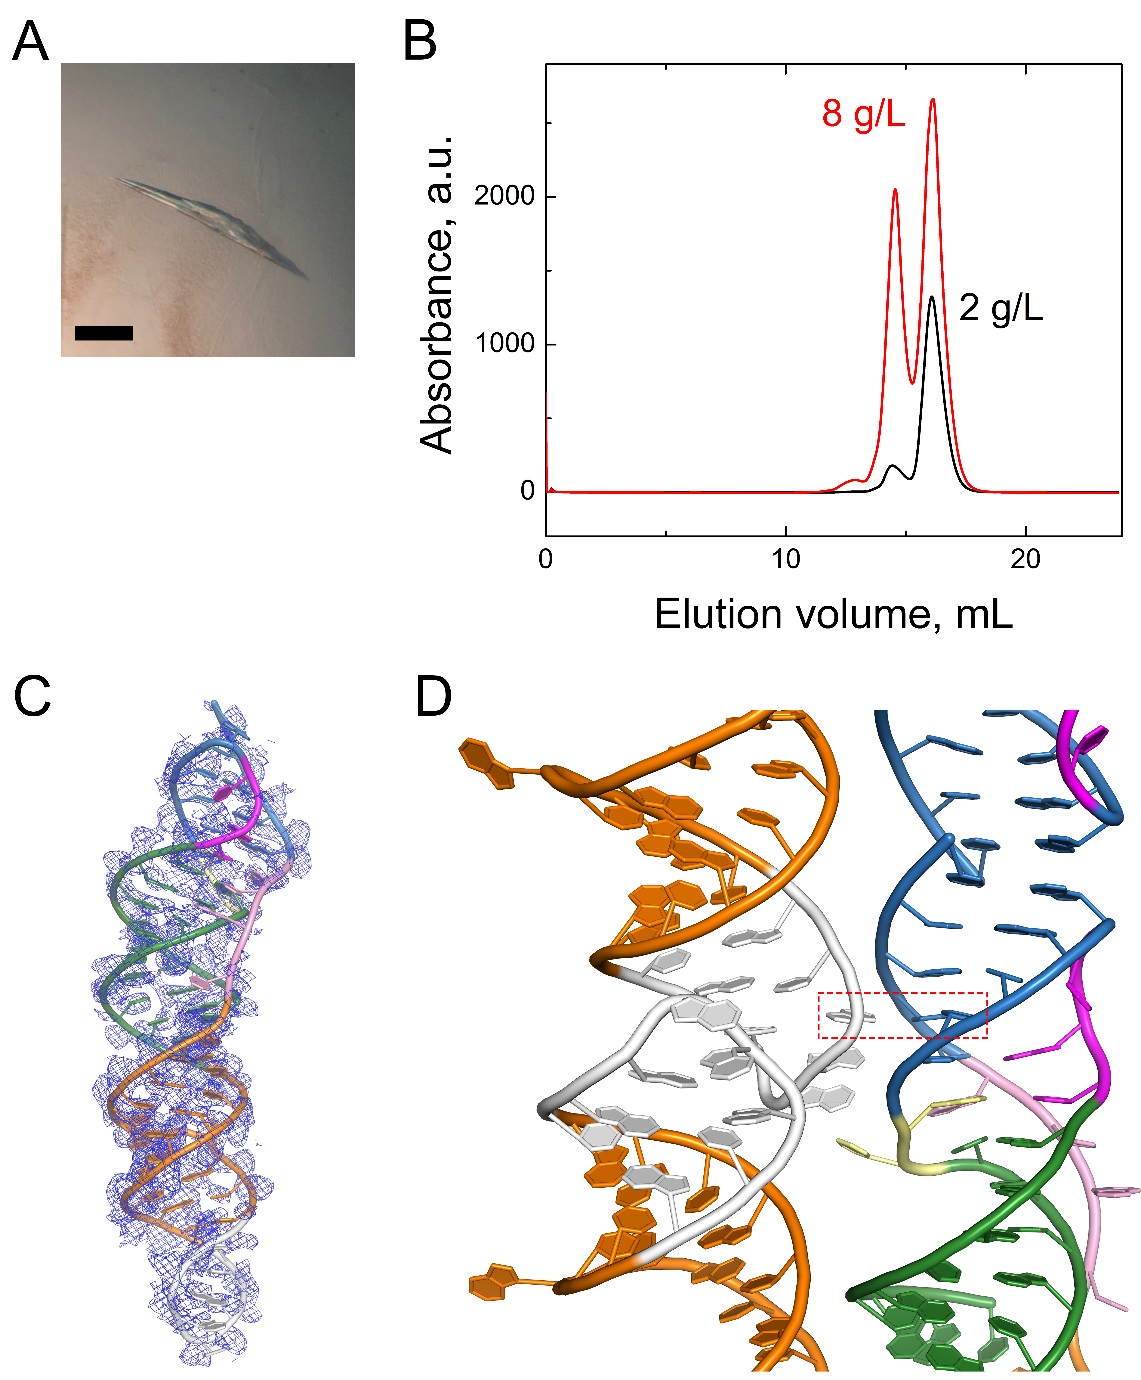


**SUPPLEMENTARY FIGURE S1.** Preparation and crystallization of the SARS-CoV-2 pseudoknot RNA. (*A*) Example crystal for the SARS-CoV-2 pseudoknot RNA. Black bar indicates 0.1 mm. (*B*) Analytical size-exclusion chromatograph of pseudoknot RNA, monitoring absorbance at 260 nm. (*C*) Portion of the density-modified experimental electron density map (blue) contoured at 1  overlaid on a cartoon of the refined model for the iridium dataset. (*D*) Cartoon representation of pseudoknot RNAs from adjacent asymmetric units, highlighting the A44•(C13491•G13539) crystal contact (red box). The GAAA tetraloops of adjacent molecules (gray) are pointing toward each other (left), and the 3' ends of adjacent molecules (blue) stack against one another (right).


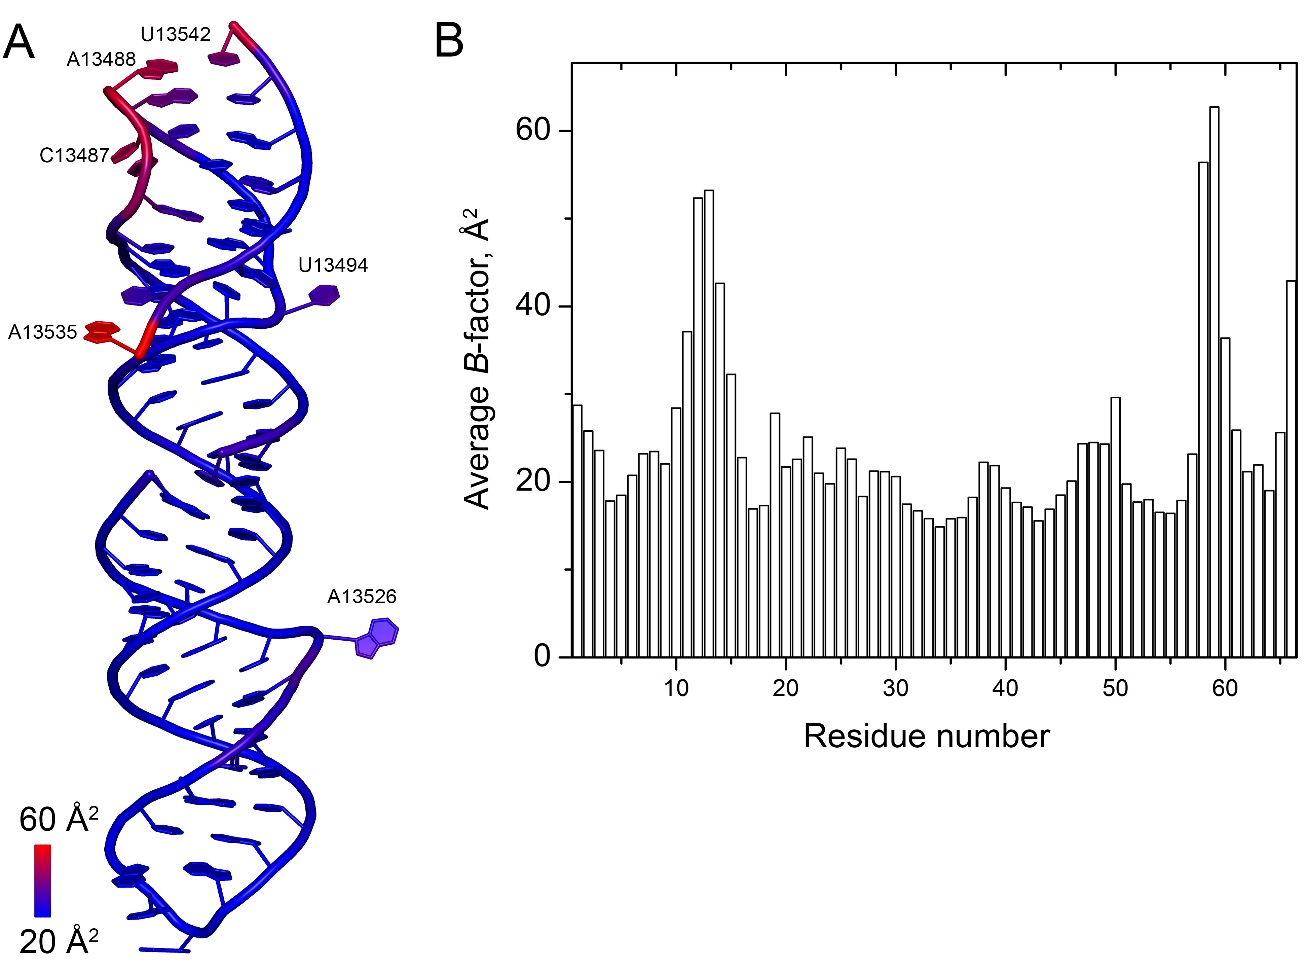


**SUPPLEMENTARY FIGURE S2.** Less ordered regions of the SARS-CoV-2 pseudoknot structure. (*A*) *B-*factors overlaid on the refined model for the high energy native dataset. (*B*) Average *B*-factors for each residue.


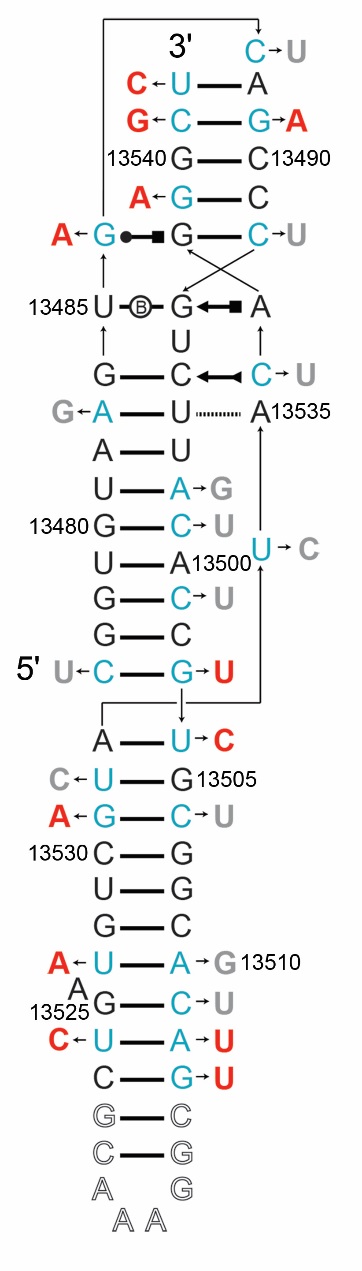


**SUPPLEMENTARY FIGURE S3.** Reported mutations in the SARS-CoV-2 pseudoknot. Variant positions are colored cyan and derived from Neupane and coworkers and Nextstrain.org ([Hadfield et al. 2018](#_ENREF_1); [Neupane et al. 2020](#_ENREF_3)). Mutations that lead to a loss in pairing are colored red, and those that they do not are colored gray. Numbering refers to nucleotide positions in the SARS-CoV-2 reference genome (NC_045512.2). Additional mutations present between 13514-22 are not shown.


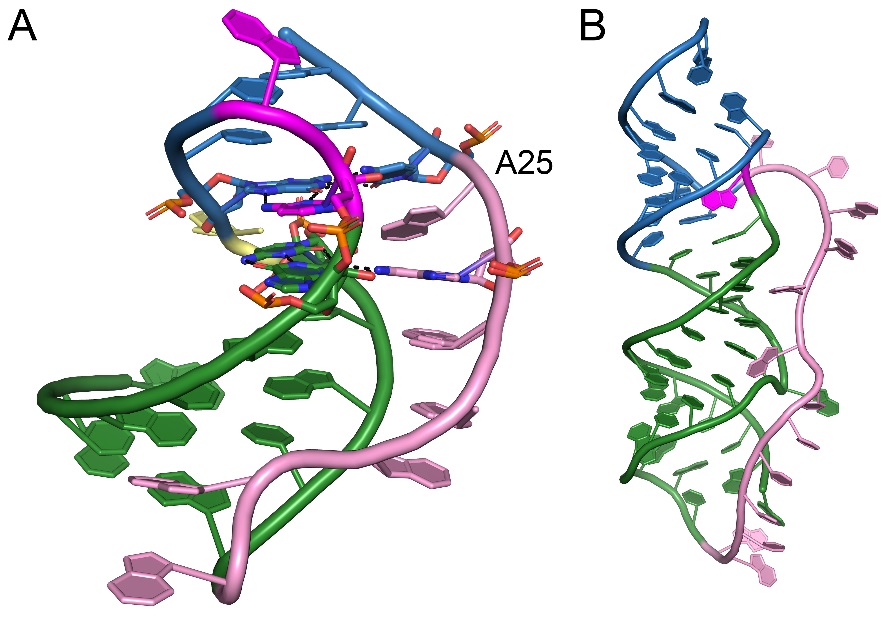


**SUPPLEMENTARY FIGURE S4.** Base triples in other viral pseudoknots. (*A*) Cartoon representation of the beet western yellow virus frameshifting pseudoknot (PDB: 1L2X) with P1 colored green and the pseudoknot P2 colored blue. From 5' to 3', the first linker is colored magenta, the second linker is colored yellow, and the third is colored pink. Black dotted lines indicate hydrogen bonds in select base triples ([Su et al. 1999](#_ENREF_4)). (*B*) Cartoon representation of the murine leukemia virus recoding element (PDB: 2LC8) with P1 colored green and the pseudoknot P2 colored blue. A17 is colored magenta, and other linker residues are colored pink. In the conformation shown, A17 is tilted away from the C23:G53 pair with which it forms a triple ([Houck-Loomis et al. 2011](#_ENREF_2)).

**SUPPLEMENTARY TABLE S1.** Oligonucleotide sequences

| **Name** | **Sequence** |
| --- | --- |
| SARS-CoV-2 GAAA plasmid DNA (template only) | TAATACGACTCACTATAGGGAGACATGTGCACGAAAGTGCACATGAACACTTACACCGCTGATGAGTCCGTGAGGACGAAACGGTACCCGGTACCGTCCGGTGTAAGTGCAGCCCGTCTTACACCGTGCGGCACAGGAAACTGATGTCGTATACAGGGCT |
| Universal transcription template forward primer | TAATACGACTCACTATAGG |
| SARS-CoV-2 transcription template reverse primer | mAmGCCCTGTATACGACATCA |
| SARS-CoV-2 GAAA 2-bp-extended mutagenic forward primer | CACCGTGCGGCACAGCGGAAACGCTGATGTCGTATACAG |
| SARS-CoV-2 GAAA 2-bp-extended mutagenic reverse primer | CTGTATACGACATCAGCGTTTCCGCTGTGCCGCACGGTG |
| SARS-CoV-2 GAAA 2-bp-extended plasmid DNA (template only) | TAATACGACTCACTATAGGGAGACATGTGCACGAAAGTGCACATGAACACTTACACCGCTGATGAGTCCGTGAGGACGAAACGGTACCCGGTACCGTCCGGTGTAAGTGCAGCCCGTCTTACACCGTGCGGCACAGCGGAAACGCTGATGTCGTATACAGGGCT |

**REFERENCES**

Hadfield J, Megill C, Bell SM, Huddleston J, Potter B, Callender C, Sagulenko P, Bedford T, Neher RA. 2018. Nextstrain: real-time tracking of pathogen evolution. *Bioinformatics* **34**: 4121-4123.

Houck-Loomis B, Durney MA, Salguero C, Shankar N, Nagle JM, Goff SP, D'Souza VM. 2011. An equilibrium-dependent retroviral mRNA switch regulates translational recoding. *Nature* **480**: 561-564.

Neupane K, Munshi S, Zhao M, Ritchie DB, Ileperuma SM, Woodside MT. 2020. Anti-Frameshifting Ligand Active against SARS Coronavirus-2 Is Resistant to Natural Mutations of the Frameshift-Stimulatory Pseudoknot. *J Mol Biol* **432**: 5843-5847.

Su L, Chen L, Egli M, Berger JM, Rich A. 1999. Minor groove RNA triplex in the crystal structure of a ribosomal frameshifting viral pseudoknot. *Nature Struct Biol* **6**: 285-292.
